DR. B. E. WELSH  
Consultant Anaesthetist  
Department of Anaesthesia  
The University of Newcastle Upon Tyne

Royal Victoria Infirmary  
Newcastle Upon Tyne NE1 4LP  
Great Britain  
(Accepted for publication April 24, 1987.)

Anesthesiology  
67:281, 1987

### Prevention of Hypoxic Gas Mixtures

*To the Editor:*—The “malfunction” detected and reported by Abraham and Basagoitia<sup>1</sup> is of particular interest because it involves failure of a device which is absent on many anesthesia machines and, in ideal practice, would not be necessary. Many users of the Ohio Modulus<sup>™</sup> have discovered that the chain coupling of its oxygen and nitrous oxide needle valves can be used to initiate 25% oxygen in nitrous flow by turning the blue knob, without touching the green. This step-saving habit courts catastrophe if attempted on any machine without a functioning chain.

One should *never* increase the flow of nitrous oxide without first confirming adequate gas flow through the oxygen rotameter; conversely, oxygen flow should never be reduced below a safe ratio with the existing

nitrous oxide flow. This approach (when raising flows, oxygen first; when decreasing them, nitrous oxide first) more reliably protects against a hypoxic gas mixture than does any device. Device failure often becomes “potentially lethal” only when safe practice is violated.

TIMOTHY J. HERBST, M.D.  
Department of Anesthesia  
Massachusetts General Hospital  
Boston, Massachusetts 02114

#### REFERENCE

1. Abraham ZA, Basagoitia J: A potentially lethal anesthesia machine failure. ANESTHESIOLOGY 66:589-590, 1987

(Accepted for publication April 27, 1987.)

Anesthesiology  
67:281, 1987

### A Laboratory Test to Detect Antibodies to Protamine

*To the Editor:*—We are developing a laboratory test to detect antibodies to protamine in patient's blood. This test will be used to document that the patient has had a protamine reaction or to predict whether the patient may safely receive protamine in those previously sensitized to this molecule.

To both develop and validate this test, I will need serum from patients who have had such reactions. If you know of a patient who has had severe anaphylactoid

reaction and in whom it appears that the agent responsible was protamine, I ask you to contact me.

JERROLD H. LEVY, M.D.  
Assistant Professor Anesthesiology  
Section of Anesthesiology  
The Emory Clinic  
1365 Clifton Road, N.E.  
Atlanta, Georgia 30322

(Accepted for publication April 27, 1987.)

Anesthesiology  
67:281-282, 1987

### Apnea and Syncope Following Intravenous Guanethidine Bier Block in the Same Patient on Two Different Occasions

*To the Editor:*—Intravenous guanethidine for the treatment of reflex sympathetic dystrophy (RSD) was

first introduced by Hannington-Kiff, based on the concept that outgrowing sprouts from damaged axons are
